# Supplementary material
Source: HighWire-hosted journal article supplement (https://rapm.bmj.com/content/48/6/302)
Supplement: inline-supplementary-material-1 [file inline-supplementary-material-1.pdf]

21 **S1: Actual Search Strategies**

22 The number of results from each database prior to removing duplicates is:

23 342 MEDLINE(R) and Epub Ahead of Print, In-Process, In-Data-Review &amp; Other Non-

24 Indexed Citations

25 369 Embase

26 215 Cochrane Central Register of Controlled Trials

27 36 Scopus

28 962 Total

29 **516** In the Endnote file with duplicates removed.

30

31 Ovid

32 Database(s): EBM Reviews - Cochrane Central Register of Controlled Trials April 2022,

33 Embase 1974 to 2022 May 27, Ovid MEDLINE(R) and Epub Ahead of Print, In-Process, In-

34 Data-Review &amp; Other Non-Indexed Citations, Daily and Versions 1946 to May 27, 2022

35 Search Strategy:

| #  | Searches                                                                                                                                                                                                                                                                                                                                                                 | Results  |
|----|--------------------------------------------------------------------------------------------------------------------------------------------------------------------------------------------------------------------------------------------------------------------------------------------------------------------------------------------------------------------------|----------|
| 1  | exp Spinal Cord Stimulation/<br>(("spinal cord" or spinal or epidural or "dorsal root" or "dorsal columnor DRGS" or                                                                                                                                                                                                                                                      | 10044    |
| 2  | DRG) adj3 (stimulat* or electrostimulat* or neuromodulat* or<br>neurostimulat*).ti,ab,kf.                                                                                                                                                                                                                                                                                | 20597    |
| 3  | 1 or 2                                                                                                                                                                                                                                                                                                                                                                   | 22508    |
| 4  | exp Pain/<br>("Alice in Wonderland Syndrome*" or arthralgia* or "back ache*" or backache* or<br>backpain* or cephalalgia* or cephalgia* or cephalodynia* or<br>cranialgia* or dorsalgia* or glossalgia* or glossodynia* or glossopyroses or                                                                                                                              | 1995671  |
| 5  | glossopyrosis or "head ache*" or headache* or hemicrania* or lumbago or<br>mammalgia* or mastalgia* or mastodynia* or metatarsalgia* or migraine* or<br>migrainous or "Morton Neuroma*" or Myalgia* or neuralgia* or neurodynia* or<br>pain* or "Piriformis Muscle Syndrome*" or polyarthralgia* or Sciatica* or "status<br>hemicranicus" or "sunct syndrome").ti,ab,kf. | 2456571  |
| 6  | 4 or 5                                                                                                                                                                                                                                                                                                                                                                   | 3184063  |
| 7  | 3 and 6<br>("Bournemouth Questionnaire" or disability or functional or nODI or ODI or<br>"Oswestry disability index" or "physical function*" or QBPDS or "Quebec Back                                                                                                                                                                                                    | 12725    |
| 8  | Pain Disability" or RMDQ or "Roland-Morris disability" or "SF-36" or "short<br>form-36" or "Waddell Disability Index" or WDI).ti,ab,kf.                                                                                                                                                                                                                                  | 3781067  |
| 9  | 7 and 8                                                                                                                                                                                                                                                                                                                                                                  | 2211     |
| 10 | limit 9 to english language                                                                                                                                                                                                                                                                                                                                              | 2125     |
| 11 | limit 9 to no language specified                                                                                                                                                                                                                                                                                                                                         | 14       |
| 12 | 10 or 11                                                                                                                                                                                                                                                                                                                                                                 | 2139     |
| 13 | (exp animals/ or exp nonhuman/) not exp humans/<br>((alpaca or alpacas or amphibian or amphibians or animal or animals or antelope or                                                                                                                                                                                                                                    | 11836635 |
| 14 | armadillo or armadillos or avian or baboon or baboons or beagle or beagles or bee<br>or bees or bird or birds or bison or bovine or buffalo or buffaloes or buffalos or "c                                                                                                                                                                                               | 10114051 |

elegans" or "Caenorhabditis elegans" or camel or camels or canine or canines or carp or cats or cattle or chick or chicken or chickens or chicks or chimp or chimpanze or chimpanzees or chimps or cow or cows or "D melanogaster" or "dairy calf" or "dairy calves" or deer or dog or dogs or donkey or donkeys or drosophila or "Drosophila melanogaster" or duck or duckling or ducklings or ducks or equid or equids or equine or equines or feline or felines or ferret or ferrets or finch or finches or fish or flatworm or flatworms or fox or foxes or frog or frogs or "fruit flies" or "fruit fly" or "G mellonella" or "Galleria mellonella" or geese or gerbil or gerbils or goat or goats or goose or gorilla or gorillas or hamster or hamsters or hare or hares or heifer or heifers or horse or horses or insect or insects or jellyfish or kangaroo or kangaroos or kitten or kittens or lagomorph or lagomorphs or lamb or lambs or lemur or lemurs or llama or llamas or macaque or macaques or macaw or macaws or marmoset or marmosets or mice or minipig or minipigs or mink or minks or monkey or monkeys or mouse or mule or mules or nematode or nematodes or octopus or octopuses or orangutan or "orang-utan" or orangutans or "orang-utans" or ostrich or ostriches or oxen or parrot or parrots or pig or pigeon or pigeons or piglet or piglets or pigs or porcine or primate or primates or quail or rabbit or rabbits or rat or rats or reptile or reptiles or rodent or rodents or ruminant or ruminants or salmon or sheep or shrimp or slug or slugs or swine or tamarin or tamarins or toad or toads or trout or urchin or urchins or vole or voles or waxworm or waxworms or wildlife or worm or worms or xenopus or "zebra fish" or zebrafish) not (human or humans or patient or patients)).ti,ab,hw,kf.

|    |                                                                                                                                                                                                                                                                                                                                                                                                                                                                                                                                                                                                                     |         |
|----|---------------------------------------------------------------------------------------------------------------------------------------------------------------------------------------------------------------------------------------------------------------------------------------------------------------------------------------------------------------------------------------------------------------------------------------------------------------------------------------------------------------------------------------------------------------------------------------------------------------------|---------|
| 15 | 12 not (13 or 14)                                                                                                                                                                                                                                                                                                                                                                                                                                                                                                                                                                                                   | 2011    |
| 16 | (case adj3 report).mp,pt.                                                                                                                                                                                                                                                                                                                                                                                                                                                                                                                                                                                           | 3374829 |
| 17 | 15 not 16                                                                                                                                                                                                                                                                                                                                                                                                                                                                                                                                                                                                           | 1738    |
| 18 | review.pt.                                                                                                                                                                                                                                                                                                                                                                                                                                                                                                                                                                                                          | 5899972 |
| 19 | 17 not 18                                                                                                                                                                                                                                                                                                                                                                                                                                                                                                                                                                                                           | 1494    |
|    | limit 19 to (conference abstract or editorial or erratum or note or addresses or autobiography or bibliography or biography or blogs or comment or dictionary or directory or interactive tutorial or interview or lectures or legal cases or legislation or news or newspaper article or overall or patient education handout or periodical index or portraits or published erratum or video-audio media or webcasts) [Limit not valid in CCTR,Embase,Ovid MEDLINE(R),Ovid MEDLINE(R) Daily Update,Ovid MEDLINE(R) PubMed not MEDLINE,Ovid MEDLINE(R) In-Process,Ovid MEDLINE(R) Publisher; records were retained] | 568     |
| 20 |                                                                                                                                                                                                                                                                                                                                                                                                                                                                                                                                                                                                                     |         |
| 21 | 19 not 20                                                                                                                                                                                                                                                                                                                                                                                                                                                                                                                                                                                                           | 926     |
| 22 | remove duplicates from 21                                                                                                                                                                                                                                                                                                                                                                                                                                                                                                                                                                                           | 586     |

36

37 Scopus

- 38 1 TITLE-ABS-KEY(("spinal cord" or spinal or epidural or "dorsal root" or "dorsal  
39 column" or DRGS or DRG) W/3 (stimulat\* or electrostimulat\* or neuromodulat\* or  
40 neurostimulat\*))
- 41 2 TITLE-ABS-KEY("Alice in Wonderland Syndrome\*" OR arthralgia\* OR "back ache\*" OR  
42 backache\* OR backpain\* OR cephalalgia\* OR cephalea\* OR cephalgia\* OR  
43 cephalodynia\* OR cranialgia\* OR dorsalgia\* OR glossalgia\* OR glossodynia\* OR

44 glossopyroses OR glossopyrosis OR "head ache\*" OR headache\* OR hemicrania\* OR  
 45 lumbago OR mammalgia\* OR mastalgia\* OR mastodynia\* OR metatarsalgia\* OR  
 46 migraine\* OR migrainous OR "Morton Neuroma\*" OR Myalgia\* OR neuralgia\* OR  
 47 neurodynia\* OR pain\* OR "Piriformis Muscle Syndrome\*" OR polyarthralgia\* OR  
 48 Sciatica\* OR "status hemicranicus" OR "sunct syndrome")  
 49 3 TITLE-ABS-KEY("Bournemouth Questionnaire" OR disability OR functional OR nODI  
 50 OR ODI OR "Oswestry disability index" OR "physical function\*" OR QBPDS OR  
 51 "Quebec Back Pain Disability" OR RMDQ OR "Roland-Morris disability" OR "SF-36"  
 52 OR "short form-36" OR "Waddell Disability Index" OR WDI)  
 53 4 LANGUAGE(english)  
 54 5 1 and 2 and 3 and 4  
 55 6 TITLE-ABS-KEY((alpaca OR alpacas OR amphibian OR amphibians OR animal OR  
 56 animals OR antelope OR armadillo OR armadillos OR avian OR baboon OR baboons OR  
 57 beagle OR beagles OR bee OR bees OR bird OR birds OR bison OR bovine OR buffalo  
 58 OR buffaloes OR buffalos OR "c elegans" OR "Caenorhabditis elegans" OR camel OR  
 59 camels OR canine OR canines OR carp OR cats OR cattle OR chick OR chicken OR  
 60 chickens OR chicks OR chimp OR chimpanze OR chimpanzees OR chimps OR cow OR  
 61 cows OR "D melanogaster" OR "dairy calf" OR "dairy calves" OR deer OR dog OR dogs  
 62 OR donkey OR donkeys OR drosophila OR "Drosophila melanogaster" OR duck OR  
 63 duckling OR ducklings OR ducks OR equid OR equids OR equine OR equines OR feline  
 64 OR felines OR ferret OR ferrets OR finch OR finches OR fish OR flatworm OR  
 65 flatworms OR fox OR foxes OR frog OR frogs OR "fruit flies" OR "fruit fly" OR "G  
 66 mellonella" OR "Galleria mellonella" OR geese OR gerbil OR gerbils OR goat OR goats  
 67 OR goose OR gorilla OR gorillas OR hamster OR hamsters OR hare OR hares OR heifer  
 68 OR heifers OR horse OR horses OR insect OR insects OR jellyfish OR kangaroo OR  
 69 kangaroos OR kitten OR kittens OR lagomorph OR lagomorphs OR lamb OR lambs OR  
 70 llama OR llamas OR macaque OR macaques OR macaw OR macaws OR marmoset OR  
 71 marmosets OR mice OR minipig OR minipigs OR mink OR minks OR monkey OR  
 72 monkeys OR mouse OR mule OR mules OR nematode OR nematodes OR octopus OR  
 73 octopuses OR orangutan OR "orang-utan" OR orangutans OR "orang-utans" OR oxen  
 74 OR parrot OR parrots OR pig OR pigeon OR pigeons OR piglet OR piglets OR pigs OR  
 75 porcine OR primate OR primates OR quail OR rabbit OR rabbits OR rat OR rats OR  
 76 reptile OR reptiles OR rodent OR rodents OR ruminant OR ruminants OR salmon OR  
 77 sheep OR shrimp OR slug OR slugs OR swine OR tamarin OR tamarins OR toad OR  
 78 toads OR trout OR urchin OR urchins OR vole OR voles OR waxworm OR waxworms  
 79 OR worm OR worms OR xenopus OR "zebra fish" OR zebrafish) AND NOT (human OR  
 80 humans or patient or patients))  
 81 7 5 and not 6  
 82 8 TITLE-ABS-KEY(case W/3 report)  
 83 9 7 and not 8  
 84 10 DOCTYPE(ab) OR DOCTYPE(ed) OR DOCTYPE(bk) OR DOCTYPE(er) OR  
 85 DOCTYPE(no) OR DOCTYPE(sh)  
 86 11 9 and not 10  
 87 12 INDEX(embase) OR INDEX(medline) OR PMID(0\* OR 1\* OR 2\* OR 3\* OR 4\* OR 5\*  
 88 OR 6\* OR 7\* OR 8\* OR 9\*)  
 89 13 11 and not 12

90 **Table S2: Physical Function Questionnaires**

| Disability Questionnaire | Score Range                             | Pain considered | Better Function With | MCID                      | Sensitivity | Specificity |
|--------------------------|-----------------------------------------|-----------------|----------------------|---------------------------|-------------|-------------|
| ODI                      | 0-100 (bed-bound)                       | Yes             | Lower Score          | 12.88 <sup>1</sup>        | 88%         | 85%         |
| RMDQ                     | 0-24 (greater disability)               | Yes             | Lower Score          | 3-5 points <sup>2,3</sup> | 75%         | 76%         |
| SF-36 PCS                | 1 of 8 subscales, 0-100 (no disability) | Yes             | Higher Score         | 4 <sup>4</sup>            | 72.2%       | 68.1%       |
| WHODAS 2.0               | 0-100% (full disability)                | No              | Lower Score          | 5% <sup>5</sup>           | NR          | NR          |

91 MCID – minimal clinically important difference; NR – not reported; ODI – Oswestry Disability  
 92 Index; RMDQ – Roland-Morris Disability Questionnaire; SF-36 PCS – 36 item short form  
 93 survey Physical Component Summary; WHODAS 2.0 – world health organization disability  
 94 assessment schedule.

<sup>1</sup> Johnsen LG, Hellum C, Nygaard OP, Storheim K, Brox JJ, Rossvoll I, Leivseth G, Grotle M. Comparison of the SF6D, the EQ5D, and the oswestry disability index in patients with chronic low back pain and degenerative disc disease. *BMC Musculoskelet Disord*. 2013 Apr 26;14:148. doi: 10.1186/1471-2474-14-148. PMID: 23622053; PMCID: PMC3648434.

<sup>2</sup> Stratford PW, Binkley J, Solomon P, Finch E, Gill C, Moreland J. Defining the minimum level of detectable change for the Roland-Morris questionnaire. *Phys Ther*. 1996 Apr;76(4):359-65; discussion 366-8. doi: 10.1093/ptj/76.4.359. PMID: 8606899.

<sup>3</sup> Jordan K, Dunn KM, Lewis M, Croft P. A minimal clinically important difference was derived for the Roland-Morris Disability Questionnaire for low back pain. *J Clin Epidemiol*. 2006 Jan;59(1):45-52. doi: 10.1016/j.jclinepi.2005.03.018. Epub 2005 Nov 4. PMID: 16360560.

<sup>4</sup> Badhiwala JH, Witiw CD, Nassiri F, Akbar MA, Jaja B, Wilson JR, Fehlings MG. Minimum Clinically Important Difference in SF-36 Scores for Use in Degenerative Cervical Myelopathy. *Spine (Phila Pa 1976)*. 2018 Nov 1;43(21):E1260-E1266. doi: 10.1097/BRS.0000000000002684. PMID: 29652783.

<sup>5</sup> Mark A. Shulman, Jessica Kasza, Paul S. Myles; Defining the Minimal Clinically Important Difference and Patient-acceptable Symptom State Score for Disability Assessment in Surgical Patients. *Anesthesiology* 2020; 132:1362–1370 doi: <https://doi.org/10.1097/ALN.0000000000003240>

95 **Table S3: Newcastle Ottawa Scale (NOS); Observational Studies Quality Assessment**

| Study             | Selection | Comparability | Exposure | Total Score |
|-------------------|-----------|---------------|----------|-------------|
| Al-Kaisy 2014     | **        | -             | *        | 3           |
| Barolat 2001      | **        | -             | *        | 3           |
| Benyamin 2020     | **        | -             | -        | 2           |
| Bolash 2022       | **        | -             | *        | 3           |
| Bondoc 2022       | **        | -             | *        | 3           |
| Brooker 2021      | **        | -             | *        | 3           |
| Burchiel 1995     | *         | -             | *        | 2           |
| Campwala 2021     | **        | -             | **       | 4           |
| Costantini 2010   | **        | -             | **       | 4           |
| De Jaeger 2021    | **        | -             | *        | 3           |
| Delmotte 2015     | **        | -             | -        | 2           |
| DiBenedetto 2018  | ***       | -             | **       | 5           |
| Do 2021           | **        | -             | *        | 3           |
| Goudman 2021      | **        | -             | *        | 3           |
| Harman 2020       | **        | -             | **       | 4           |
| Jonsson 2020      | **        | -             | *        | 3           |
| Kallewaard 2021   | **        | -             | *        | 3           |
| Kamieniak 2019    | ***       | -             | **       | 5           |
| Kinfe 2014        | ***       | -             | *        | 4           |
| Mehta 2022        | **        | -             | *        | 3           |
| Mosiewicz 2015    | **        | -             | *        | 3           |
| Mullins 2022      | **        | -             | *        | 3           |
| Paul 2017         | **        | -             | *        | 3           |
| Perez 2021        | ***       | -             | *        | 4           |
| Slavin 1999       | **        | -             | -        | 2           |
| Spincemaille 2004 | **        | -             | *        | 3           |
| Van Buyten 2013   | **        | -             | *        | 3           |
| Van Heteren 2022  | **        | -             | **       | 4           |
| Zucco 2015        | **        | -             | *        | 3           |

96 The quality of observational studies was determined by the Newcastle-Ottawa scale. It includes three  
97 categories: Selection (Maximum of 4 stars), Comparability (Maximum of 2 stars), and outcome  
98 (Maximum of 3 stars). “\*” signify star point for a given category. “-” signify no awarded stars in each  
99 category. Total score is the sum of stars across all three categories.

100 **Table S4: Included study groups' key for the forest plots:**

|                                                                          |
|--------------------------------------------------------------------------|
| • Al-Kaisy 2022                                                          |
| ○ Al-Kaisy 2022: Group 1: Anatomic placement group                       |
| ○ Al-Kaisy 2022 Group 2: Paresthesia mapping group                       |
| • Campwala 2021                                                          |
| ○ Campwala 2021 Group 1: SCS for patients with no previous spine surgery |
| ○ Campwala 2021 Group 2: SCS with history of previous spine surgery      |
| • De Andres 2017                                                         |
| ○ De Andres 2017 Group 1: Conventional frequency                         |
| ○ De Andres 2017 Group 2: HF                                             |
| • Paul 2017                                                              |
| ○ Paul 2017 Group 1: Success                                             |
| ○ Paul 2017 Group 2: Failure                                             |
| • Van Heteren 2022                                                       |
| ○ Van Heteren 2022 Group 1: SCS                                          |
| ○ Van Heteren 2022 Group 2: SCS + PNFS                                   |

101 **Figure S5: Funnel Plot for 12-Months ODI Pre & Post SCS Outcome**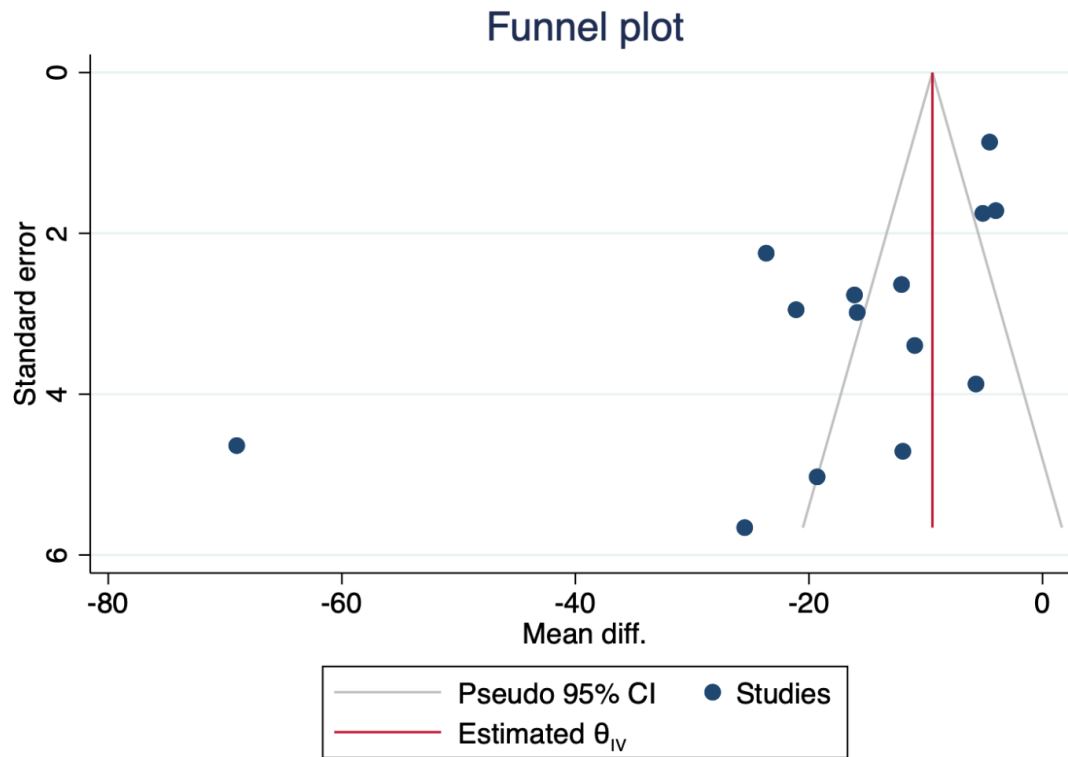

102



103 Table S6: Included Studies Outcomes and Trends

| Study                               | Metric | Baseline Scores                                                        | Mean Scores after SCS                                                                                                                                                                              | Overall Trend                                                                                                                                                                                                                                                                                                                                                                                                                                                                                                                                                                                                            |
|-------------------------------------|--------|------------------------------------------------------------------------|----------------------------------------------------------------------------------------------------------------------------------------------------------------------------------------------------|--------------------------------------------------------------------------------------------------------------------------------------------------------------------------------------------------------------------------------------------------------------------------------------------------------------------------------------------------------------------------------------------------------------------------------------------------------------------------------------------------------------------------------------------------------------------------------------------------------------------------|
| <b>Randomized Controlled Trials</b> |        |                                                                        |                                                                                                                                                                                                    |                                                                                                                                                                                                                                                                                                                                                                                                                                                                                                                                                                                                                          |
| Al-Kaisy et al. 2022                | ODI    | G1: 59.4 (14.5) N=22<br>G2: 58.7 (9.7) N=21                            | G1:<br>3 months: 33.8 (22.6) N=21<br>6 months: 41.5 (23.5) N=19<br>12 months: 33.9 (21.5) N=19<br>G2:<br>3 months: 37.3 (20.5) N=21<br>6 months: 36.9 (20.2) N=21<br>12 months: 39.4 (20.8) N=20   | Significant Improvement in ODI at 3,6,12 months ( $p < 0.001$ ). No significant inter-group differences in ODI scores ( $p = 0.66$ ). Baseline of G1 45% and G2 48% of patients in crippling disability reduced to 11% and 15% at 12-months followup.                                                                                                                                                                                                                                                                                                                                                                    |
| De Andres et al. 2017               | ODI    | G1: 27.18 (5.21) N=29<br>G2: 26.96 (5.8) N=26                          | G1:<br>3 months: 31 (23.3) N=81<br>6 months: 21.07 (9.9) N=29<br>12 months: 22.07 (7.86) N=29<br>G2:<br>3 months: 21.85 (8.59) N=26<br>6 months: 22.92 (6.85) N=26<br>12 months: 22.96 (7.06) N=26 | Significant mean reduction of 5–6 points in the ODI scores. A global average reduction of 4 points in both groups (conventional SCS v HF SCS) at the 12-month assessment.                                                                                                                                                                                                                                                                                                                                                                                                                                                |
| Eldabe et al. 2010                  | SF-36  | ODI: 56.4 (13.9) N=100 (SCS+CMM)<br>SF-36: 27.4 (0.61) N=100 (SCS+CMM) | SF-36: 6 months: 32.3 (7.98) N=50                                                                                                                                                                  | Significant improvements at 6 months after SCS across seven of ten ODI sub-dimensions (all $p < 0.05$ ). With the exception of personal care, these improvements were maintained at 24 months. Two subdimensions (personal care and sleeping) did not improve compared with baseline. Furthermore, continuing disability (score of 4 or more) remained with lifting and standing in 35–40% of SCS patients at 24 months. At 3 and 6 months PCS SF-36 were significantly improved ( $p < 0.05$ ). Compared with baseline, significant SF-36 component score improvements were maintained at 24 months (both $p < 0.01$ ). |
| Hara et al. 2022                    | ODI    | 44.7 (95% CI: 41.4–47.9) N=47                                          | 3 months: 34.0 (95% CI: 30.0–38.1) N=91*                                                                                                                                                           | Mean change of -10.6 points (95% CI -14.1 to -7.2 points) for burst stimulation.<br>* Post-SCS Total N was number of stimulation periods rather than number of patients.                                                                                                                                                                                                                                                                                                                                                                                                                                                 |
| Kapural et al.                      | ODI    | ODI: 46.8                                                              | 6 months: 24.1 (16.1)                                                                                                                                                                              | The mean ODI score for patients in the 10-kHz SCS treatment group                                                                                                                                                                                                                                                                                                                                                                                                                                                                                                                                                        |

|                                         |           |                                                  |                                                                                          |                                                                                                                                                                                                                                                      |
|-----------------------------------------|-----------|--------------------------------------------------|------------------------------------------------------------------------------------------|------------------------------------------------------------------------------------------------------------------------------------------------------------------------------------------------------------------------------------------------------|
| 2022                                    |           |                                                  | 12 months: 24.0 (17.0)                                                                   | decreased significantly ( $p < 0.001$ ) at the 3 and 6 month follow-ups.                                                                                                                                                                             |
| Kumar et al. 2007                       | ODI SF-36 | ODI: 57.4 (12.5) N=52<br>SF-36: 24.7 (16.4) N=52 | ODI: 6 months: 44.9 (18.8) N=50<br>SF-36: 6 months: 38.1 (23) N=50                       | Compared with the CMM group, SCS group patients experienced enhanced health-related quality of life on seven of the eight dimensions of the SF-36 ( $p < 0.02$ ) and superior function (ODI, $p < 0.001$ ).                                          |
| Rigoard et al. 2019                     | ODI SF-36 | ODI: 55.9 (14.6)<br>SF-36: 24.08 (6.73)          | ODI: 6 months: 43.9 (18.4)<br>SF-36: 6 months: 31.58 (10.04)                             | Significant improvement at 6 mo ODI scores ( $p < 0.001$ ) in the SCS+OMM "as treated" group as well as in the "ITT" and "completers" groups.                                                                                                        |
| <b>Non Randomized Controlled Trials</b> |           |                                                  |                                                                                          |                                                                                                                                                                                                                                                      |
| Al-Kaisy et al. 2014                    | ODI       | 55 (1) N=72                                      | 24 months: 40 (2) N=65                                                                   | Significant Improvement in ODI at 24 months ( $p < 0.001$ ). Baseline 90% of patients were classified as crippled or severely disabled, and this reduced to 49% at 24 months.                                                                        |
| Barolat et al. 2001                     | ODI       | 54.8 (12.2) N=41                                 | 6 months: 45.7 (14.9) N=24<br>12 months: 49.1 (14.5) N=15                                | Significant improvement in ODI at 6 ( $p < 0.001$ ) and 12 months ( $p < 0.05$ ).                                                                                                                                                                    |
| Benyamin et al. 2020                    | ODI       | 51.5 (11.3) N=32                                 | 3 months: 32.1 N=32                                                                      | Significant improvement in ODI at 3 months ( $p < 0.01$ ). Baseline of 22% of patients in moderate disability, 63% in severe disability to 3-months outcome with 26% in minimal disability, 50% in moderate disability and 19% in severe disability. |
| Bolash et al. 2022                      | ODI       | 54 (18) N=49                                     | 1 month: 32.6 N=37<br>3 months: 34.2 N=39<br>6 months: 29.2 (18) N=39                    | Mean ODI decreased 46% indicating a reduction from severe to moderate disability.                                                                                                                                                                    |
| Bondoc et al. 2022                      | ODI       | 24.32 (7.4) N=189                                | 12 months: 19.79 (8.94) N=189                                                            | Mean ODI decreased significantly at 12 mo ( $p < 0.001$ ).                                                                                                                                                                                           |
| Brooker et al. 2021                     | ODI       | 52.3 (12.3) N=50                                 | 3 months: 34.6 (13.7) N=44<br>12 months: 31.2 (16.1) N=43<br>24 months: 31.5 (20.7) N=38 | Significant improvement in ODI scores at 3 mo ( $p < 0.001$ ), 12 mo ( $p < 0.001$ ), and 24 mo ( $p < 0.001$ ).                                                                                                                                     |
| Burchiel et al. 1995                    | ODI       | ODI: 52.3 (12.3) N=50                            | 3 months: 44 (20) N=45                                                                   | Significant improvement in ODI ( $p < 0.001$ ) and Sickness Impact Profile ( $p < 0.001$ )                                                                                                                                                           |
| Campwala et al. 2021                    | ODI       | G1: 49.48 (14.9) N=45<br>G2: 49.56 (13.4) N=73   | G1: 12 months: 38.54 (17.98) N=45<br>G2: 12 months: 37.49 (17.77) N=73                   | G1 & G2 showed significant improvement in ODI scores from baseline to 12 mo ( $p < 0.001$ ).                                                                                                                                                         |
| Costantini et al. 2010                  | ODI       | 34.3 (7.6) N=28                                  | Follow-up Average of 24 months:<br>15.7 (13.1) N=28                                      | Significant improvement in ODI scores from 34.3 (7.6) at baseline to 15.7 (13.1) at follow-up ( $p < 0.05$ ), with a mean improvement of 54% at follow-up.                                                                                           |
| De Jaeger et al. 2021                   | ODI       | 58 (15.92) N=81                                  | 3 months: 31 (23.33) N=81                                                                | Significant improvement in ODI scores at 3 mo ( $p < 0.001$ ).                                                                                                                                                                                       |
| Delmotte et                             | ODI       | 60.27 (CI: 2.887) N=72                           | 6 months: 33.43 (CI: 3.877) N=14                                                         | The "optimized lead positioning" patients (N=14) had significant                                                                                                                                                                                     |

|                         |                    |                                                           |                                                                                                |                                                                                                                                                                                                                                                                                                                                                                                                                           |
|-------------------------|--------------------|-----------------------------------------------------------|------------------------------------------------------------------------------------------------|---------------------------------------------------------------------------------------------------------------------------------------------------------------------------------------------------------------------------------------------------------------------------------------------------------------------------------------------------------------------------------------------------------------------------|
| al. 2015                |                    |                                                           |                                                                                                | functional improvement from 60.67% baseline ODI to 33.43% ODI at 6 months.                                                                                                                                                                                                                                                                                                                                                |
| DiBenedetto et al. 2018 | RMDQ<br>WHODAS 2.0 | RMDQ: 13.9 (4.5) N=21<br>WHODAS 2.0: 1.97 (0.42) N=19     | RMDQ: 12 months: 10.8 (4.8) N=21<br>WHODAS 2.0: 12 months: 1.92 (0.64) N=19                    | After 12 mo, there was significant "within-group change" for RMDQ-m scores in the SCS + CMM group (p<0.02). There was no significant "within-group change" for WHODAS 2.0 in the SCS+CMM group at 12 mo follow-up.                                                                                                                                                                                                        |
| Do et al. 2021          | ODI                | ODI: 54                                                   | ODI: 42                                                                                        | Significant improvement in ODI scores at 24 mo follow-up (p<0.0001)                                                                                                                                                                                                                                                                                                                                                       |
| Goudman et al. 2021     | ODI                | 57 (17.97) N=185                                          | 1 month: 31.26 (17.58) N=130<br>3 months: 30.64 (18.52) N=114<br>12 months: 33.34 (16.86) N=92 | Significantly improvement in ODI at 1 month (P < 0.001), 3 months (P < 0.001), and 12 months (P < 0.001) (F = 133.14, P < 0.001)                                                                                                                                                                                                                                                                                          |
| Harman et al. 2020      | ODI                | 85 (8.9) N=16                                             | 12 months: 16 (16.3) N=16                                                                      | Significant improvement in ODI at 12 mo follow-up (p<0.001).                                                                                                                                                                                                                                                                                                                                                              |
| Jonsson et al. 2020     | ODI                | 48 (15) N=239                                             |                                                                                                | At 1,2, and 5 years there was no significant difference in "To-be SCS patients" for ODI scores. However, there was significant difference in ODI for "All patients" at 1,2, and 5 year follow up. Both groups reported "severe disability" for ODI at baseline, while the "All patients" group had improvement to "moderate disability" by 5 years and the "To-be SCS patients" remained at the "severe disability" mark. |
| Kallewaard et al. 2021  | ODI                | 52.4 (1.6) N=58                                           | 1 month: 33.3 (2.5) N=58                                                                       | Patients' level of disability as per ODI scores had an average reduction of 19.1 +/- 2.0 points at 1 mo, 19.7 +/- 2.3 at 6 mo and 25.3 +/- 2.3 at 12 months of treatment. After 12 months of treatment, 62% of patients were reclassified as per ODI categories from severely disabled or crippled to moderately or minimally disabled.                                                                                   |
| Kamieniak et al. 2019   | ODI                | 31.47 (6.23) N=24                                         | 1 month: 26.15 (7.87) N=17<br>3 months: 22.5 (7.57) N=12                                       | Significant improvement in ODI scores from baseline to 3 and 6 months (p<0.02).                                                                                                                                                                                                                                                                                                                                           |
| Kinfe et al. 2014       | ODI                | Cylindrical lead: 49.5 (12.3)<br>Paddle lead: 38.6 (16.3) | Cylindrical lead (43.3)<br>Paddle lead 37.3 (13.6)                                             | Evaluation of the ODQ suggested gradual amelioration in both groups (cylindrical lead group and paddle lead group).                                                                                                                                                                                                                                                                                                       |
| Mehta et al. 2022       | ODI                | 53.13 N=19                                                | 1 month: 35.33 N=17<br>3 months: 33.64 N=17<br>12 months: 37.4 N=16                            | Significant improvement in ODI scores at 1, 3, and 12 months; (p = 0.003), (p = 0.004), and (p = 0.011), respectively. The number of patients who experienced "crippling" pain sustained at less than 50% at 1, 3, and 12 months                                                                                                                                                                                          |
| Mosiewicz et            | ODI                | 36.75 (5.11) N=36                                         | 6 months: 30.08 (8.4) N=36                                                                     | There is a statistically significant correlation between a decrease in                                                                                                                                                                                                                                                                                                                                                    |

|                          |              |                                                                                                                  |                                                                                                                                                                   |                                                                                                                                                                                                                                                                                 |
|--------------------------|--------------|------------------------------------------------------------------------------------------------------------------|-------------------------------------------------------------------------------------------------------------------------------------------------------------------|---------------------------------------------------------------------------------------------------------------------------------------------------------------------------------------------------------------------------------------------------------------------------------|
| al. 2015                 |              |                                                                                                                  |                                                                                                                                                                   | lower limb pain and level of disability according to the ODI (P<0.04).                                                                                                                                                                                                          |
| Mullins et al. 2022      | ODI          | 30.78 (10.15) N=25                                                                                               | 6 months: 9.74 (6.94) N=25                                                                                                                                        | Significant improvement in ODI at 6 mo (p < 0.001).                                                                                                                                                                                                                             |
| Paul et al. 2017         | ODI          | G1: 52 (15.1) N=35<br>G2: 51.2 (16.2) N=13                                                                       | G1: 6 months: 40/5 (15.9) N=35<br>G2: 6 months: 53.8 (15.2) N=13                                                                                                  | At 6 mo, patients who were satisfied with SCS therapy had an average improvement of 11.5 points on the ODI compared to an average decline of 1.8 points in the patients who were not satisfied (P = .06)                                                                        |
| Perez et al. 2021        | ODI          | 59.37 N=39                                                                                                       | 3 months: 39.64 N=38<br>6 months: 36.4 N=36<br>12 months: 38.48 N=34<br>24 months: 35.4 N=33                                                                      | Significant improvement in ODI only at 6 months (P = 0.0368). SCS patients maintained a moderate disability from 3 months follow-up to the last monitoring visit. The SCS arm reported reduced symptoms from baseline to 3 months and remained relatively stable thereafter.    |
| Slavin et al. 1999       | ODI          | 49.8 N=9                                                                                                         | 1 month: 47.9 N=9                                                                                                                                                 | No significant improvement in ODI at 1 month (p = 0.46; paired t test).                                                                                                                                                                                                         |
| Spincemaille et al. 2004 | RMDQ         | RDQ: 16.9 (3.5) N=105                                                                                            | RDQ: 12.4 (4.8) N=96                                                                                                                                              | At 12 mo follow up there was statistically significant improvement (p<0.05) for scores in SCS patients.                                                                                                                                                                         |
| Van Buyten et al. 2013   | ODI          | 55 N=72                                                                                                          | 3 months: 37 N=70<br>6 months: 38 N=72                                                                                                                            | Significant improvement in ODI at 6 mo follow up (p< 0.001).                                                                                                                                                                                                                    |
| van Heteren et al. 2022  | ODI<br>SF-36 | ODI:<br>G1: 49.1 (14.1) N=21<br>G2: 57.37 (10.8) N=54<br>SF-36:<br>G1: 36.67 (21.17) N=21<br>G2: 25 (14.18) n=54 | ODI:<br>G1: 12 months: 37.14 (15.98) N=21<br>G2: 12 months: 41.5 (18.98) N=54<br>SF-36:<br>G1: 12 months: 52.14 (26.30) N=21<br>G2: 12 months: 41.94 (20.20) N=54 | Patients in both groups had less disability at 12 months, as shown by the total score of the ODI (SCS + PNFS, p < 0.01 and SCS-only, p = 0.004). Significant reduction in SF-36 scores at 12 months following SCS (p<0.001).                                                    |
| Zucco et al. 2015        | ODI          | 61.6 (15) N=80                                                                                                   | 6 months: 45.6 (20.1) N=80<br>12 months: 45.5 (19.6) N=79<br>24 months: 42.4 (20.1) N=78                                                                          | Significant improvement in ODI at 6 and 24 months (p < 0.0001). The proportion of patients classified as “severe,” “crippled” or “serious” according to the ODI classes (91% at baseline) decreased significantly (z = 5.754, p < 0.0001) 24 months post-SCS treatment (47.5%). |

105 **Figure S7-9: Forest plot diagrams of baseline ODI scores compared with ODI Scores at**  
 106 **3,6,24 months**

107 **Figure S7: Forest plot of comparison: 1 ODI Pre & Post SCS, outcome: ODI 3 month.**

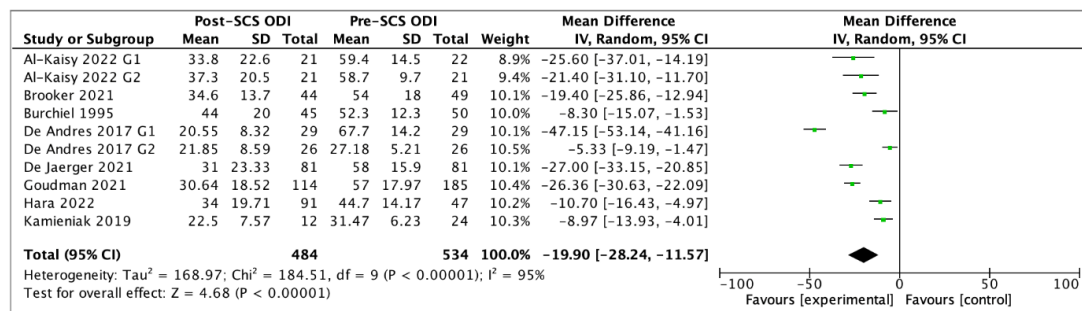

108

109 \*For Hara et al. Post-SCS ODI Total N was number of stimulation periods rather than  
 110 number of patients.

111 **Figure S8: Forest plot of comparison: 1 ODI Pre & Post SCS, outcome: ODI 6 month.**

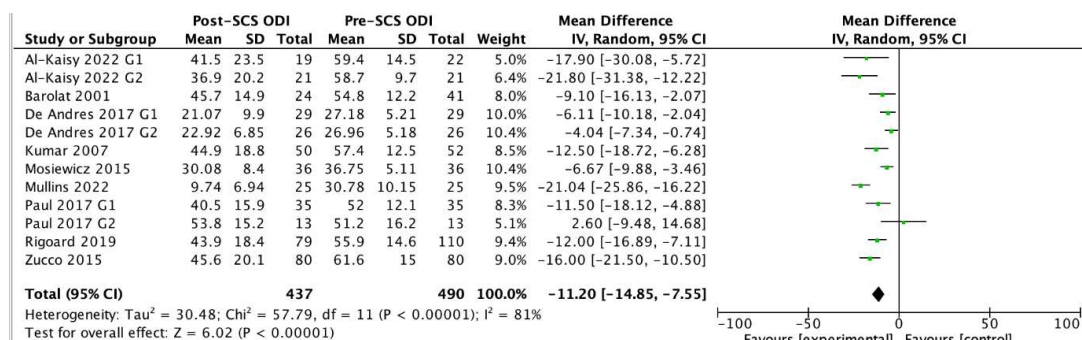

112

113 **Figure S9: Forest plot of comparison: 1 ODI Pre & Post SCS, outcome: ODI 24 months.**

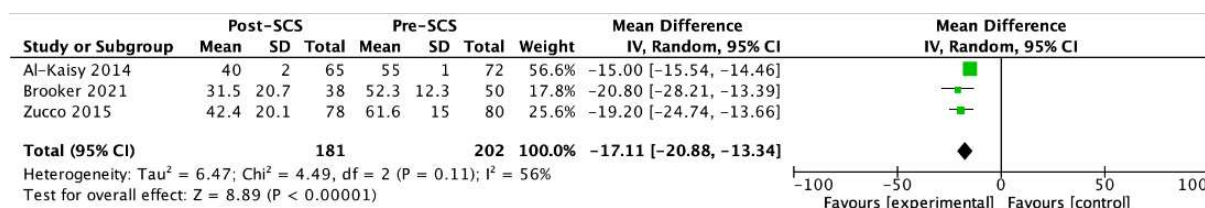

114

115

116 **Figure S10: Forest plot of comparison: 1 SF-36 Pre & Post SCS, outcome: SF-36 6-**  
 117 **months.**

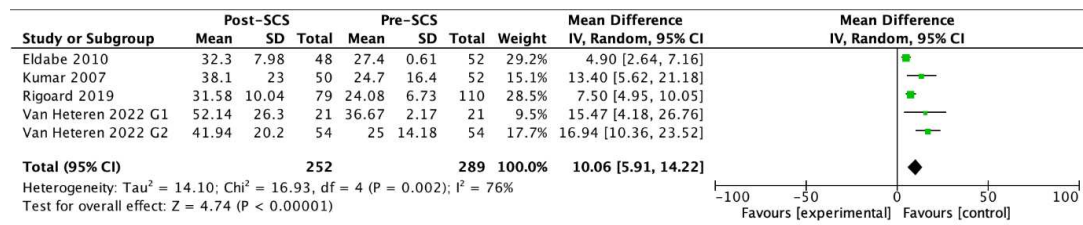

118  
 119

120 **Figure S11: Study Type Subgroup Forest Plot Comparison: ODI Pre & Post SCS, Outcome:**  
 121 **ODI 12 Months**

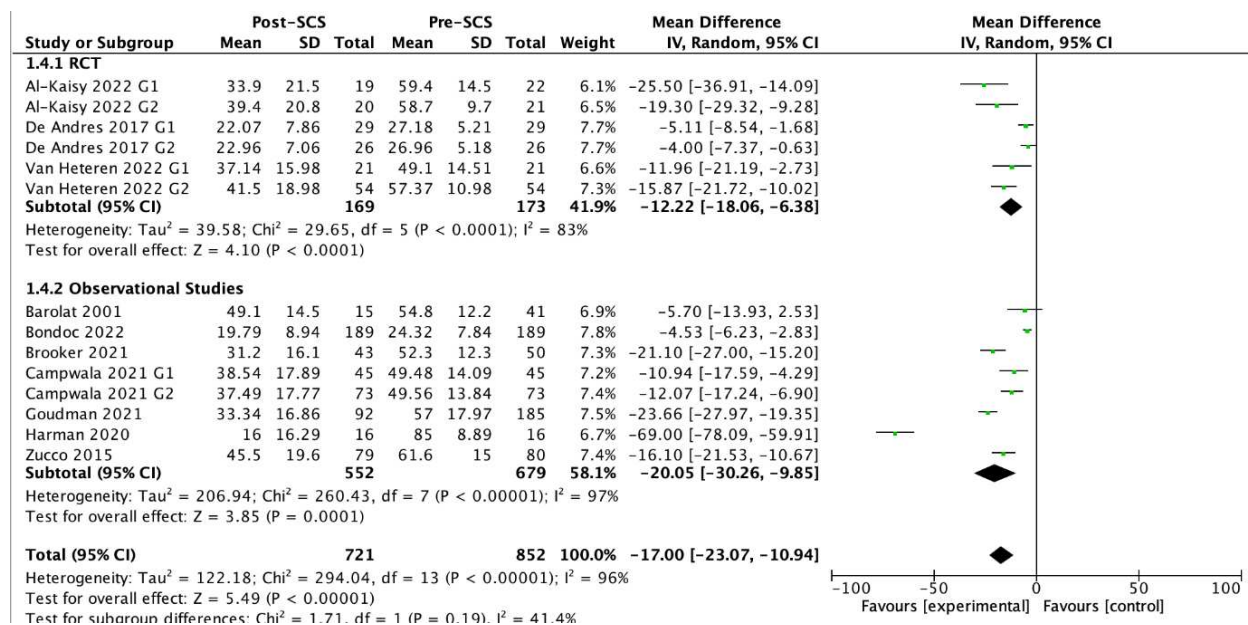

122  
123

124 **Figure S12: Funding Type Subgroup Forest Plot Comparison: ODI Pre & Post SCS, Outcome:**  
 125 **ODI 12 Months**

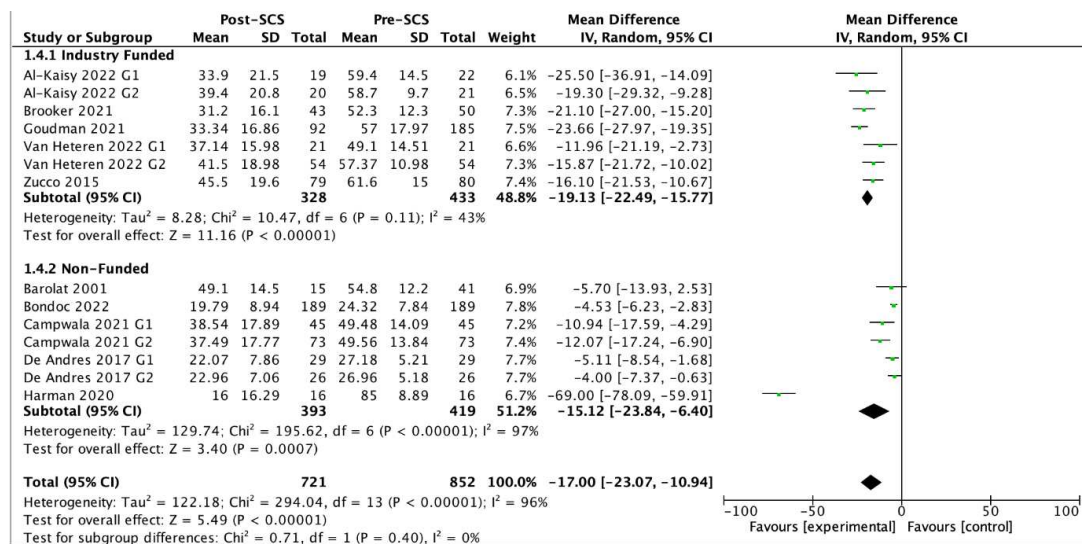

126  
127



128 **Figure S13: Stimulation Type Subgroup Forest plot Comparison: ODI Pre & Post SCS,**  
 129 **Outcome: 12 Months**

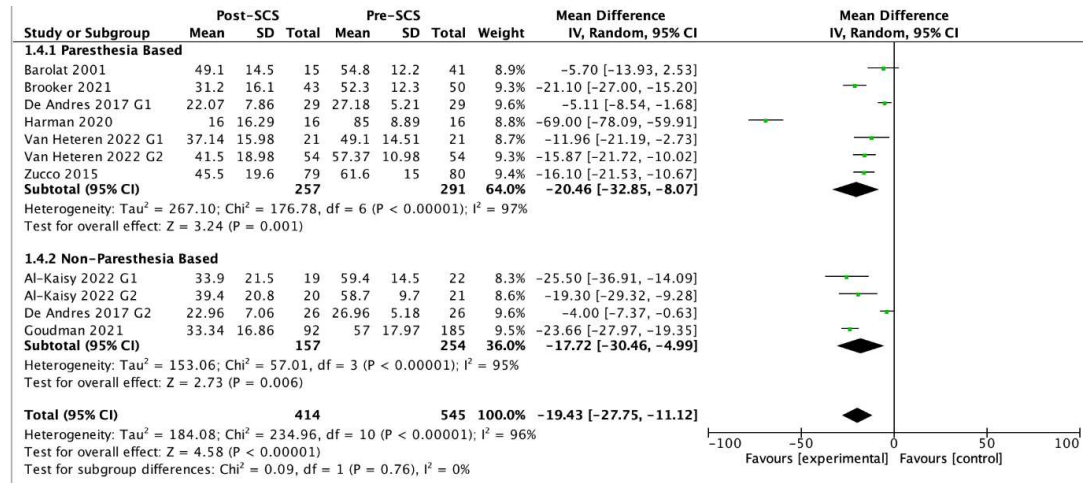

130
